# Supplementary material for: Social Complexification and Pig (Sus scrofa) Husbandry in Ancient China: A Combined Geometric Morphometric and Isotopic Approach
Source: PLoS One. 2016 Jul 6;11(7):e0158523. doi: 10.1371/journal.pone.0158523 (PMC4934769; doi:10.1371/journal.pone.0158523)
Supplement: S1 Table — (XLSX) [file pone.0158523.s002.xlsx]

## Sheet: Feuil1
ID	locality	phases	species	bone part	sides	%C	%N	δ13C	δ15N
XB4	T17④	Ⅰ	badger	mandible	right	40.6	15.6	-19.6	7.7
XD09	T8⑨	Ⅰ	deer	humerus	right	23.9	8.6	-21	4.8
XP30	T11⑿	Ⅰ	pig	mandible	right	43	15.4	-21.5	2.7
XP18	T10G14①	Ⅰ	pig	mandible	left+right	42.4	15.3	-20.5	4.6
XP08	T1⒁	Ⅰ	pig	mandible	left	40.7	14.5	-19.8	5.6
XP46	T21④	Ⅰ	pig	mandible	left	43.4	16	-18.6	6.3
XP26	T11⑾	Ⅰ	pig	mandible	right	43.7	16.1	-16.5	5.9
XP27	T11⑿	Ⅰ	pig	mandible	left+right	35.9	13	-16.4	5.4
XP47	T21②	Ⅰ	pig	mandible	left	44.1	16	-16.1	5.9
XP28	T11G14①	Ⅰ	pig	mandible	right	42.8	15.5	-13.9	5.8
XP78	T17③	Ⅰ	pig	mandible	left+right	41.6	14.9	-13.2	6.4
XU7	T11H314	Ⅱ	bear	femur	left	36.2	14.4	-20.8	5
XD01	T1⒀	Ⅱ	deer	humerus	right	45.7	16.7	-23.4	3.6
XP23	T11⑨B	Ⅱ	pig	mandible	left	39.9	14.6	-17.9	4.8
XP12	T10⑨B	Ⅱ	pig	mandible	left+right	36.6	13.3	-17.9	6.8
XP73	T7⑤B	Ⅱ	pig	mandible	left+right	33.2	12.1	-17.7	4.2
XP05	T1⒀	Ⅱ	pig	mandible	right	42.6	15.4	-16.1	6
XP21	T11⑨B	Ⅱ	pig	mandible	left+right	45.2	16.5	-15.1	6
XP11	T10⑨B	Ⅱ	pig	mandible	left+right	43.5	15.4	-14.5	5.9
XP24	T11⑨B	Ⅱ	pig	mandible	left+right	22.2	8.1	-12.6	7.4
XP22	T11⑧	Ⅱ	pig	mandible	left	39.3	14.3	-11.9	6.3
XD05	T3⑦	Ⅲ	deer	humerus	right	45.1	16.3	-20.3	3.6
XD07	T8③	Ⅲ	deer	humerus	right	44.1	16	-21.2	5.6
XR2	T10H34	Ⅲ	hare	femur	right	38.4	14.9	-20.4	6.3
XH12	T2⑤	Ⅲ	human	femur	right	37	14.8	-10.3	7.3
XP02	T2⑥	Ⅲ	pig	mandible	right	44.8	16.2	-21.1	3.9
XP68	T5⑨	Ⅲ	pig	mandible	left	44.1	16.1	-20.6	4
XP50	T3H93	Ⅲ	pig	mandible	right	46.9	17.1	-19.7	6.1
XP04	T4⑥	Ⅲ	pig	mandible	left	42.8	15.4	-19.5	4.3
XP03	T3⑥	Ⅲ	pig	mandible	right	39.6	14.3	-19.2	4.6
XP14	T10③	Ⅲ	pig	mandible	right	42.6	15.5	-17.2	5.1
XP69	T5⑾	Ⅲ	pig	mandible	left	44.4	16.2	-17.1	4.9
XP09	T10⑧	Ⅲ	pig	mandible	left	38.7	13.8	-16.7	5.8
XP01	T1⑥	Ⅲ	pig	mandible	left	43.4	15.5	-11.9	6.5
XP59	T4H198	Ⅲ	pig	mandible	left	46.1	16.7	-11	7
XP61	T4H216	Ⅲ	pig	mandible	right	46	16.8	-9.7	6.8
XP75	T8③	Ⅲ	pig	mandible	right	45.3	16.4	-7.6	6.5
XU10?	T5⑧	Ⅲ	tiger	ulna	right	41.1	15.6	-15	9.2
XP42	T20⑥	Ⅳ	pig	mandible	right	34.2	12.4	-17.5	5.2
XP45	T20⑥	Ⅳ	pig	mandible	left+right	29.1	9.6	-16.4	8.1
XP64	T5H173	Ⅳ	pig	mandible	left	45.6	16.6	-15.4	6.6
XP36	T20⑥	Ⅳ	pig	mandible	right	15.4	5.3	-14.6	8.2
XP65	T5H147	Ⅳ	pig	mandible	left+right	42.4	15.6	-13	7.7
XP37	T20⑥	Ⅳ	pig	mandible	right	28.4	10.8	-10.7	6.4
XD04	T23H324	Ⅴ	deer	humerus	right	43.2	15.8	-21.3	4.7
XD02	T2H140	Ⅴ	deer	humerus	left	45	16.4	-23.8	5.6
XP52	T3H16	Ⅴ	pig	mandible	left+right	46.1	16.7	-21.1	3.2
XP07	T1H143	Ⅴ	pig	mandible	left+right	41.2	14.7	-9.6	5.7
XP06	T1④	Ⅴ	pig	mandible	right	41.1	14.5	-10.7	5.9
XP31	T2④	Ⅴ	pig	mandible	left	43.5	16	-13.3	5.9
XP34	T2H67	Ⅴ	pig	mandible	left+right	40.4	14.8	-10.5	6.2
XP51	T3H17	Ⅴ	pig	mandible	right	30.5	11	-10.2	6.9
XP25	T11H36	Ⅴ	pig	mandible	left+right	40.2	14.8	-12.6	7
XP32	T2④	Ⅴ	pig	mandible	right	43.2	15.8	-8.5	7
XD03	T2③	Ⅵ	deer	humerus	right	43.3	15.5	-21.5	3.9
XP53	T3H23	Ⅵ	pig	mandible	right	43.6	15.9	-14	6.6
XP54	T3③	Ⅵ	pig	mandible	left	42.1	15.2	-15.4	8.2
XP55	T4③	Ⅵ	pig	mandible	left	39.1	14.4	-11.2	7.6
XP56	T5③	Ⅵ	pig	mandible	left	37.8	14	-10.5	7.4
XP70	T6③	Ⅵ	pig	mandible	left+right	35.3	12.8	-11.5	8
XT6	T5③	Ⅵ	tiger	humerus	left	35.1	14.2	-13.5	9.4
